# Supplementary material for: A carbon dot-based Co-nanozyme with alkaline phosphatase – mechanism and application
Source: Royal Society of Chemistry journal article supplement (doi:10.1039/d1ra04483d), 2021-01-01
Supplement: d1ra04483d1.pdf [file d1ra04483d1.pdf]

Supple  
Fig. S1

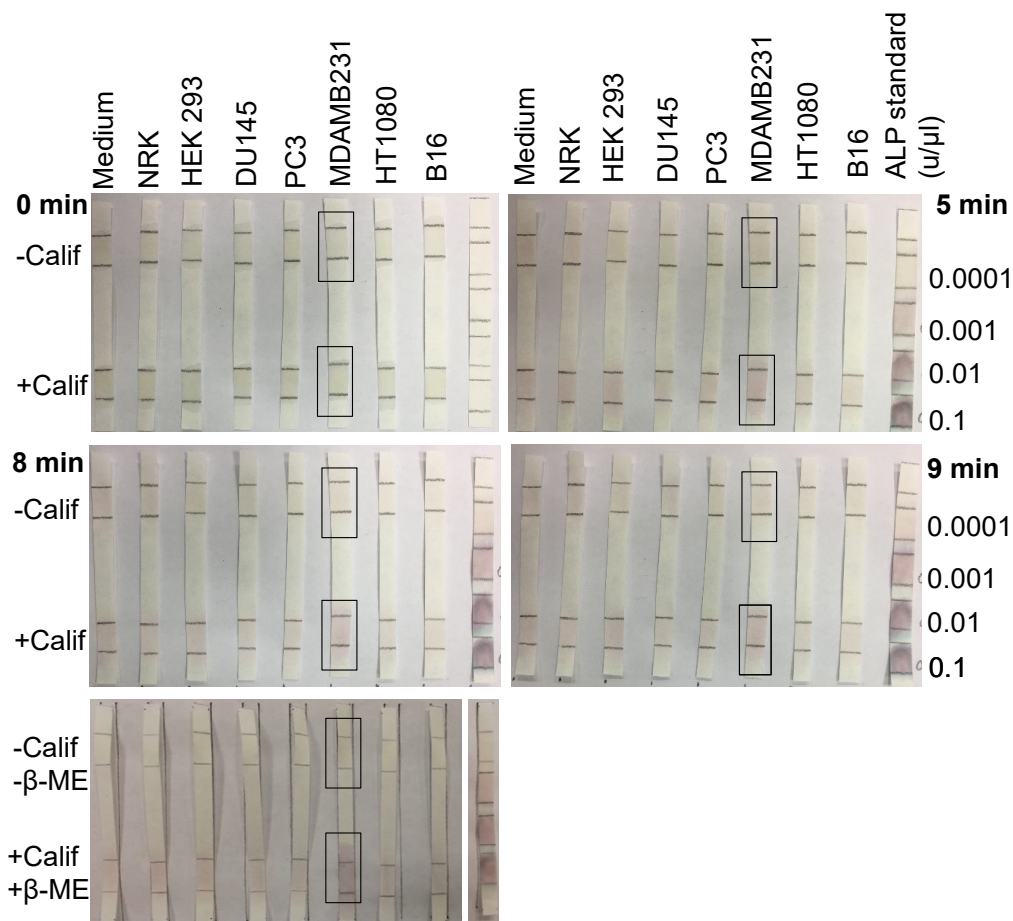

Rapid paper strip based ALP testing of medium samples from differential cancer cell lines.  
A. BCIP-NBT was used as substrate with or without cauliflower CND were applied to the filter paper first followed by medium solution. During reactions color changes were recorded by imaging for differential times.  $\beta$ -mercaptoethanol ( $\beta$ -ME) enhanced the color.

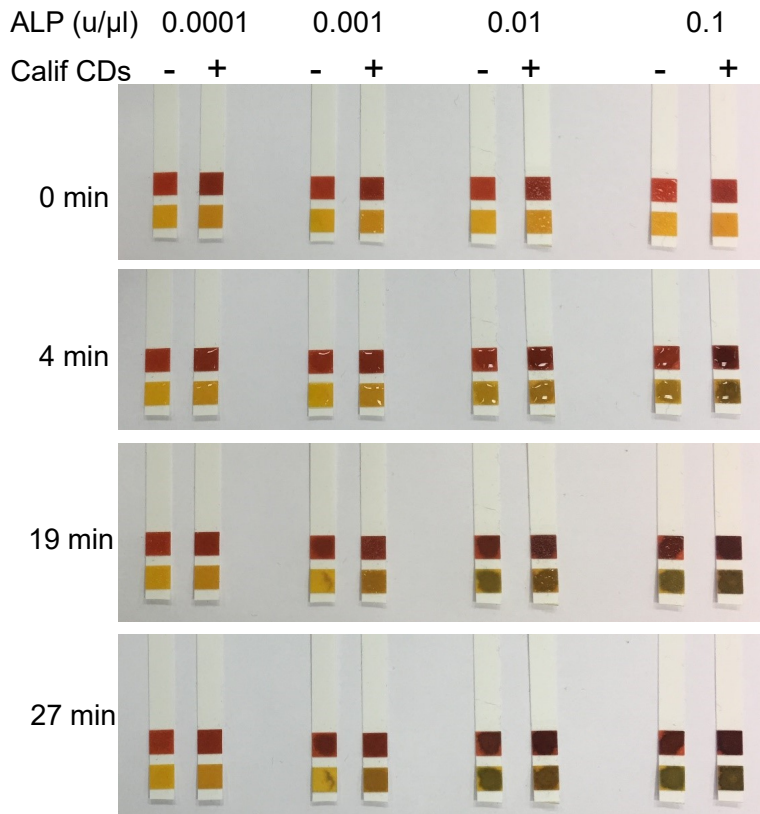

2.5 mg/ml Calif CDs on color paper strip

Rapid paper strip based ALP testing of protein ALP samples. BCIP-NBT was used as substrate with or without cauliflower CND were applied to the filter paper first followed by ALP protein. During reactions color changes were recorded by imaging for differential times.  $\beta$ -mercaptoethanol ( $\beta$ -ME) enhanced the color. White paper strip was repeated and analysis was shown based on standard curve by strip.

Supple  
Fig. S2  
White paper strip

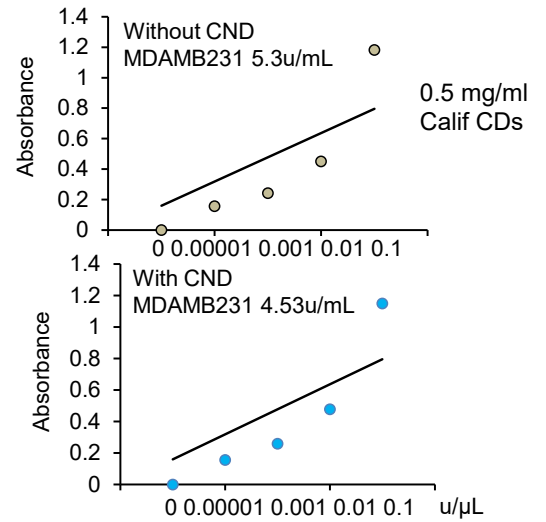

Supple  
Fig. S3

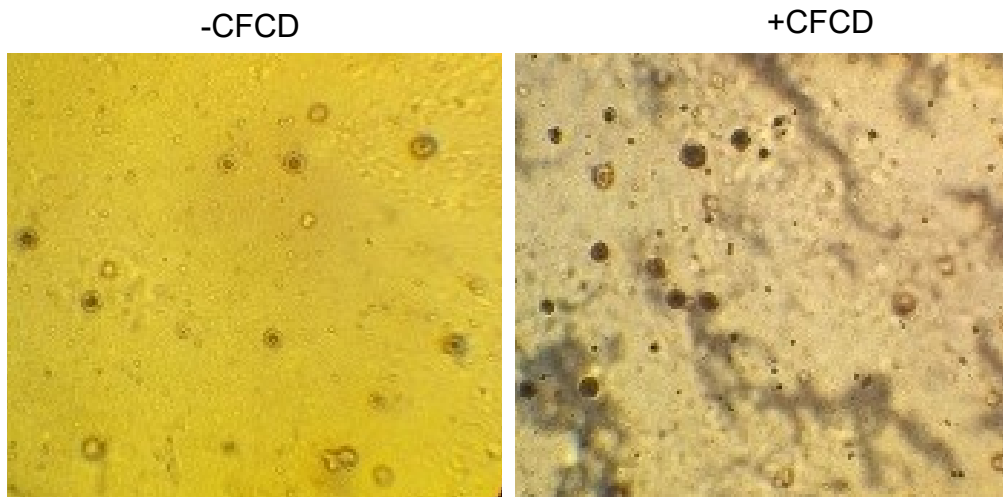

Rapid soft agar-stem-like cancer cells detection by ALP testing of cells. BCIP-NBT was used as substrate with or without cauliflower CND were applied to the soft agar plate. During reactions color changes were recorded by imaging.
